# Supplementary material for: Quantitative determination of voriconazole by thionine reduction and its potential application in a pharmaceutical and clinical setting
Source: Royal Society of Chemistry journal article supplement (doi:10.1039/d2ay01431a), 2023-01-01

### Supplementary material

Fig. 1S Effect of pH on UV-Vis spectra of TH.

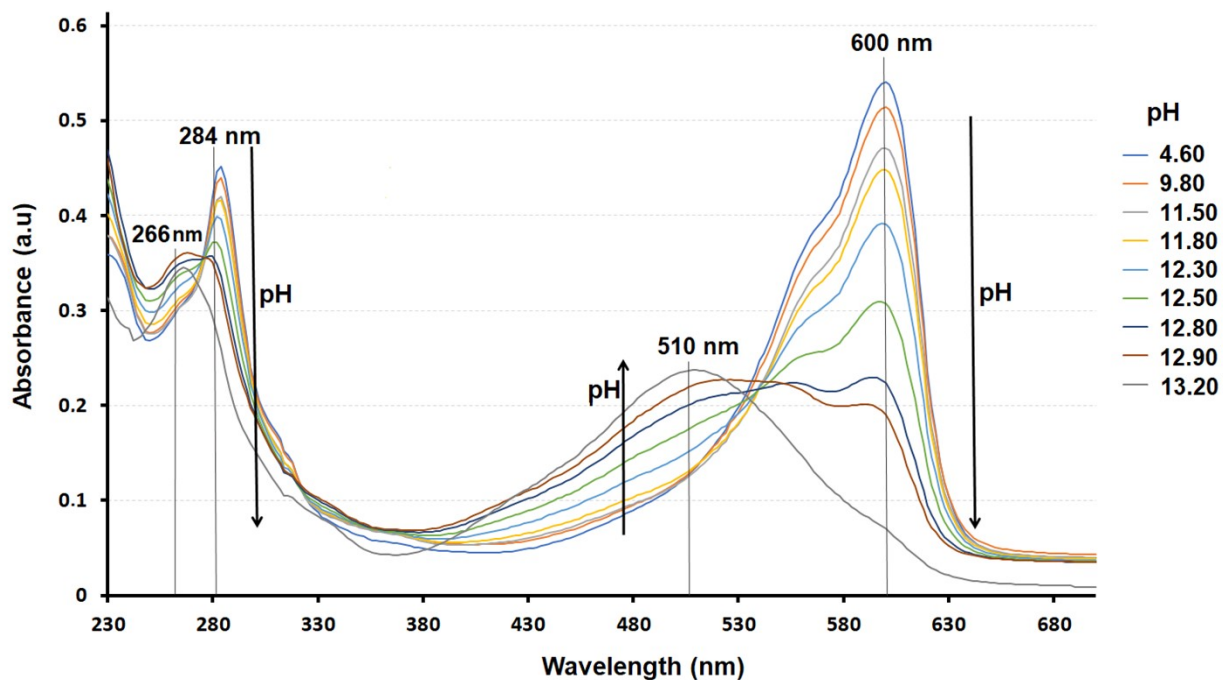

Fig. 2S UV-Vis spectra of TH (blue line) and TH-VCZ (red line) solutions at neutral pH.

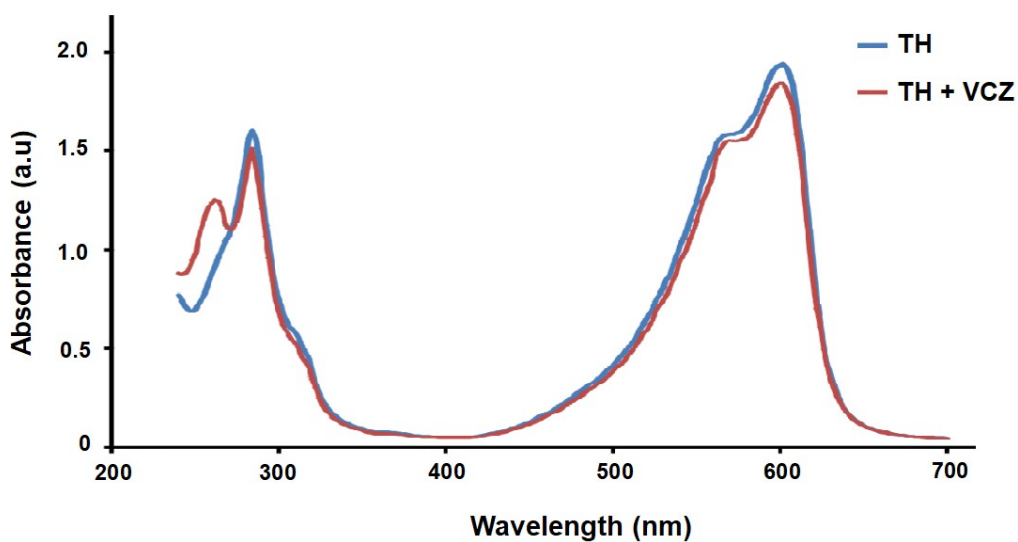

**Fig. 3S** UV-Vis absorption spectra of TH (red) and LTH (black) at pH = 13.0 (A), and reduction of TH (red) to LTH (colorless) (B).

(A)

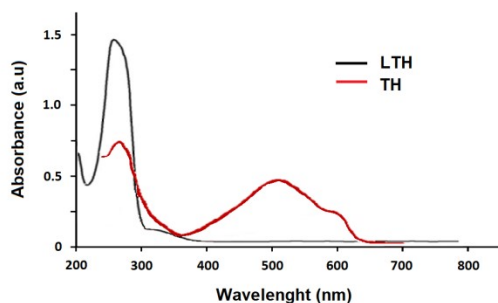

(B)

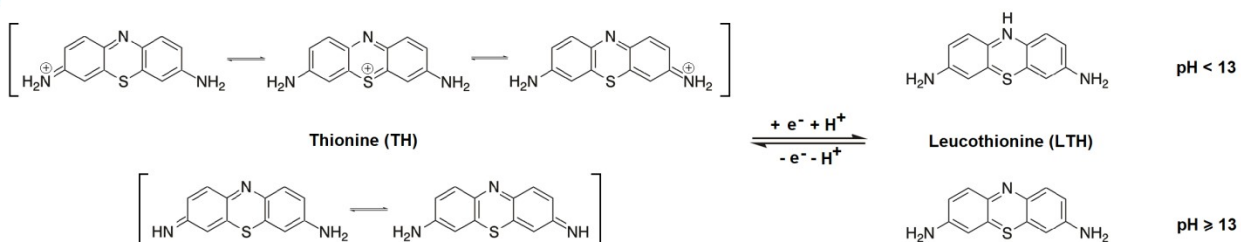

**Table 1S** Statistical parameters of the TH-VCZ reaction

| Slope  | Se(slope) | Intercept | Se(intercept) | Correlation coefficient<br>(R <sup>2</sup> ) | Se(y)  |
|--------|-----------|-----------|---------------|----------------------------------------------|--------|
| 0.0107 | 0.0001    | 0.0574    | 0.0063        | 0.999                                        | 0.0069 |

Fig. 4S Linearity of the TH-VCZ determination at  $\lambda = 514$  nm. Conditions: room temperature, 2-h incubation.

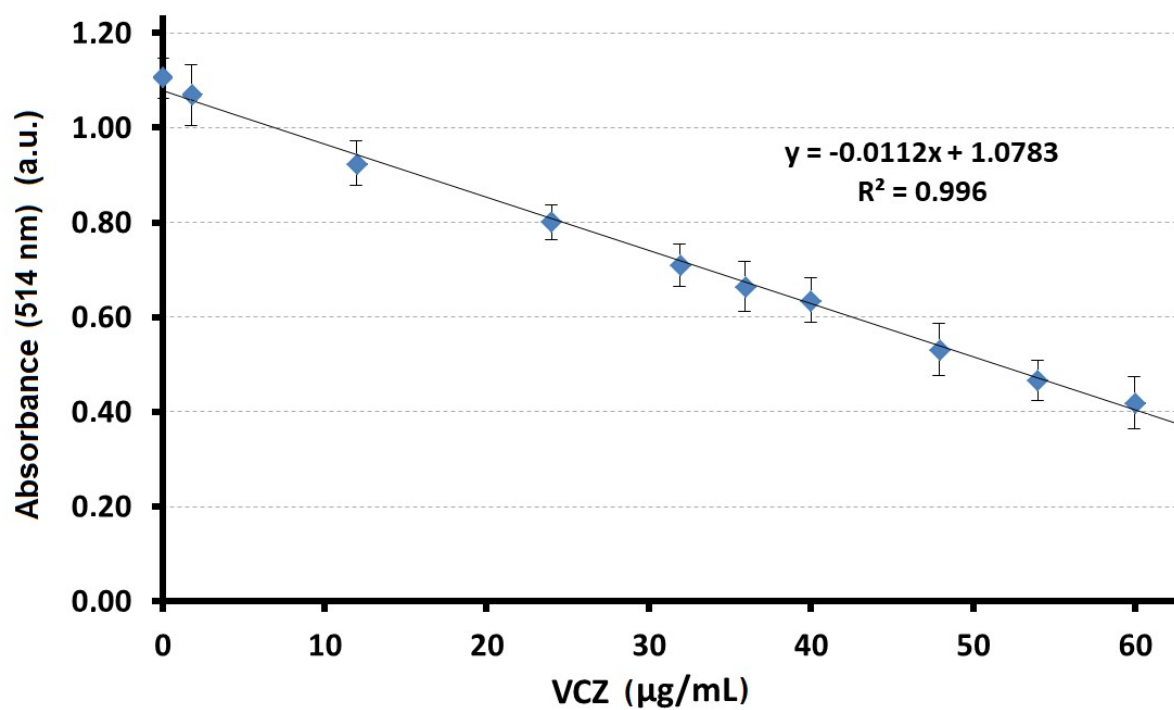

Supplement: d2ay01431a1.pdf [file d2ay01431a1.pdf]
